# Supplementary material for: Cardiovascular Disease Among Women Who Gave Birth to an Infant With a Major Congenital Anomaly
Source: PubMed Central journal article supplement (PMC6324496; doi:10.1001/jamanetworkopen.2018.2320), 2018-09-21
Supplement: jamanetwopen-1-e182320-s001.pdf [file jamanetwopen-1-e182320-s001.pdf]

## Supplementary Online Content

Cohen E, Horváth-Puhó E, Ray JG, et al. Cardiovascular disease among women who gave birth to an infant with a major congenital anomaly. *JAMA Netw Open*. 2018;1(5):e182320. doi:10.1001/jamanetworkopen.2018.2320

**eTable 1.** Diagnostic and Procedural Codes Used in the Study, With Relevant References for Validation Studies

**eTable 2.** Development of the Cardiovascular Disease Composite Outcome of Hospitalization for Acute Myocardial Infarction, Coronary Artery Revascularization, or Acute Stroke, Evaluating Mothers Whose Infant Had a Major Congenital Anomaly With Matching Dissolved Stratified by Duration of Follow-up (Additional Analysis 6)

**eFigure.** Development of the Cardiovascular Disease Composite Outcome of a Hospitalization for Acute Myocardial Infarction, Coronary Artery Revascularization, or Acute Stroke, Evaluating Mothers Whose Infants Had a Multi-Organ or Single-Organ Major Congenital Anomaly and Those in the Comparison Cohort (Additional Analysis 2)

### eReferences

This supplementary material has been provided by the authors to give readers additional information about their work.

eTable 1. Diagnostic and procedural codes used in the study, with relevant references for validation studies.

## EXPOSURE

### 1. Major Congenital Anomalies<sup>1,2</sup> by Organ System (based on 2014 EUROCAT categorization of subgroups of congenital anomalies)

|                          | ICD8                                                                                                                                                                                                                                                                                                                                                                                                                                      | ICD10                                                                                                                                                                                                                                                                                                                                                                                                                                                                                                                                                                                                                                                                                                                                                                                                                                                                                                                                          |
|--------------------------|-------------------------------------------------------------------------------------------------------------------------------------------------------------------------------------------------------------------------------------------------------------------------------------------------------------------------------------------------------------------------------------------------------------------------------------------|------------------------------------------------------------------------------------------------------------------------------------------------------------------------------------------------------------------------------------------------------------------------------------------------------------------------------------------------------------------------------------------------------------------------------------------------------------------------------------------------------------------------------------------------------------------------------------------------------------------------------------------------------------------------------------------------------------------------------------------------------------------------------------------------------------------------------------------------------------------------------------------------------------------------------------------------|
| All congenital anomalies | <p>740-759, <i>excluding</i> the following minor congenital anomalies</p> <p><u>Exclusions:</u> 745.19-745.99, 747.09 (if gestational age &lt; 37 weeks and no other congenital heart disease), 750.09, 750.19, 751.09, 752.10 - 752.19, 752.84, 755.69, 756.81, 756.29, 756.30, 756.31, 765.39, 757.10, 757.11, 757.12, 757.13, 757.18</p> <p>Also <u>include:</u> 761.39 (congenital rubella) and 761.49 (congenital toxoplasmosis)</p> | <p>All Q chapter <i>excluding</i> the following minor congenital anomalies</p> <p><u>Exclusions:</u> Q671, Q674, Q672, Q189, Q670, Q673, Q753, Q135, Q101, Q102, Q752, Q103, Q105, Q170, Q171, Q172, Q173, Q174, Q175, Q179, Q180, Q181, Q182, Q189, Q385, Q186, Q382, Q184, Q187, Q185, Q674, Q381, Q189, Q680, Q740G, Q845, Q8280, Q653-656, Q668, Q669, Q665, Q845, Q663, Q666, Q662, Q667, Q664, Q833, Q825, Q766, Q765, Q683, Q684, Q685, Q675, Q764L, Q676, Q682A, Q677, Q678, Q760, Q767C, Q270, Q250 (if GA &lt; 37 weeks), Q211C, Q256 (if GA &lt; 37 weeks), Q261, Q254E, Q331, Q314, Q315, Q320, Q401, Q430, Q400, Q633, Q610, Q627, Q552F, Q527, Q525, Q523, Q552, Q53, Q899, Q950, Q951</p> <p>Q53 and Q65 specifically excluded due to poor validity in Danish National Patient Register</p> <p>Also <u>include</u> (add) D215 (benign neoplasm of pelvis), D821 (DiGeorge Syndrome), D1810 (lymphangioma), P350, P351, P371</p> |

| Major Congenital Anomalies <sup>1,2</sup> by Organ System - <i>Continued</i> |                                                                                                                                        |                                                                                        |
|------------------------------------------------------------------------------|----------------------------------------------------------------------------------------------------------------------------------------|----------------------------------------------------------------------------------------|
|                                                                              | ICD8                                                                                                                                   | ICD10                                                                                  |
| NERVOUS SYSTEM                                                               | 740-743.99                                                                                                                             | Q00-Q07                                                                                |
| EYE                                                                          | 744-744.99                                                                                                                             | Q10-Q15 (exclude Q101-Q103, Q105, Q135)                                                |
| EAR, FACE and NECK                                                           | 745.0-745.09, (exclude 745.19-745.99, 756.81)                                                                                          | Q16-Q18 (exclude Q170-Q175, Q179, Q180-Q182, Q184-Q187, Q189)                          |
| CONGENITAL HEART DISEASE                                                     | 746, 747<br>(for 747.09 (patent ductus arteriosus),<br>exclude if gestational age < 37 weeks and<br>no other congenital heart disease) | Q20-Q26 (exclude Q250 (if GA < 37 weeks), Q211C, Q256 (if GA < 37 weeks), Q254E, Q261) |
| RESPIRATORY                                                                  | 748                                                                                                                                    | Q30-34 (exclude Q314, Q315, Q320, Q331)                                                |
| ORO-FACIAL CLEFT                                                             | 749                                                                                                                                    | Q35-Q37                                                                                |
| DIGESTIVE SYSTEM                                                             | 750.2-750.99 [exclude 750.09 (tongue anomalies) and 750.19 (pyloric stenosis)],<br>756.80                                              | Q38-Q45, Q790 (exclude Q381, Q382, Q385, Q400, Q401, Q430)                             |
| ABDOMINAL WALL DEFECTS                                                       | 751.1 – 751.99 [exclude 751.09 (Meckel's diverticulum)]                                                                                | Q792, Q793, Q795                                                                       |
| URINARY                                                                      | 752 (exclude 752.10-752.19)                                                                                                            | Q60-Q64, Q794 (exclude Q610, Q627, Q633)                                               |
| OTHER EXCLUSIONS                                                             |                                                                                                                                        | <u>Q760, Q764L, Q765, Q766, Q767C, Q825, Q8280, Q833, Q899, Q950, Q951, Q845</u>       |
| OTHER ANOMALIES/<br>SYNDROMES                                                | As below                                                                                                                               | As below                                                                               |
| Skeletal Dysplasia                                                           | 756.48, 756.49, 756.59, 756.60, 756.4                                                                                                  | Q740B, Q77, Q780, Q782-Q788                                                            |
| Craniosynostosis                                                             | 756.00                                                                                                                                 | Q750                                                                                   |
| Congenital constriction bands/amniotic bands                                 | No code                                                                                                                                | No code                                                                                |
| Situs Inversus                                                               | 759.00-759.09                                                                                                                          | Q893                                                                                   |
| Conjoined Twins                                                              | 759.19                                                                                                                                 | Q894                                                                                   |
| Congenital skin disorders                                                    | 757.20-757.99                                                                                                                          | Q80-Q82                                                                                |
| VATER/VACTERL                                                                | No code                                                                                                                                | Q872G                                                                                  |

| Major Congenital Anomalies <sup>1,2</sup> by Organ System - <i>Continued</i> |                                                                       |                                                                                      |
|------------------------------------------------------------------------------|-----------------------------------------------------------------------|--------------------------------------------------------------------------------------|
|                                                                              | ICD8                                                                  | ICD10                                                                                |
| Vascular Disruption Anomalies                                                | 751.11, 751.19, 755.24-755.25, 755.49, 755.28, 755.31, 751.82, 756.89 | Q411, Q412, Q418, Q710, Q712, Q713, Q720, Q722, Q723, Q730, Q793, Q795, Q798S, Q870G |
| Laterality Anomalies                                                         | 745.89, 748.69, 759.00, 759.01, 759.09                                | Q206, Q240, Q890, Q893                                                               |
| Teratogenic syndromes with malformations                                     | 761.39                                                                | Q86, P350, P351, P371                                                                |
| Fetal Alcohol Syndrome                                                       | No code                                                               | Q860                                                                                 |
| Valproate syndrome                                                           | No code                                                               | No code                                                                              |
| Maternal infections resulting in malformations                               | 761.39                                                                | P350, P351, P371                                                                     |
| Genetic Syndromes and Microdeletions                                         | 753.10                                                                | Q447B, Q619A, Q751, Q754, Q87, Q936, D821                                            |
| Chromosomal                                                                  | 759                                                                   | Q90-Q92; Q93, Q96-99                                                                 |

Note: At least 1 code in two or more organ systems required for inclusion as multi-organ major congenital anomalies.

The ascertainment of congenital anomalies in Danish hospital registries has predictive value (in %) of 88.2 (95% CI: 85.9, 90.5)] and completeness (in %) of 89.9 (95% CI: 87.7, 92.1).<sup>1</sup>

## OUTCOMES

|                                                       | ICD8                                                                    | ICD10                                       | Procedure/Surgery Codes                                                                                                                                  |
|-------------------------------------------------------|-------------------------------------------------------------------------|---------------------------------------------|----------------------------------------------------------------------------------------------------------------------------------------------------------|
| <b>Acute myocardial infarction</b>                    | 410                                                                     | I21, I22, I23                               |                                                                                                                                                          |
| <b>Stroke<sup>3</sup></b>                             | 43100, 43108, 43109, 43190, 43198, 43199, 433, 434, 43601, 43609, 43690 | I60, I61, I63 (excluding I63.6), I64, H34.1 |                                                                                                                                                          |
| <b>Percutaneous coronary intervention<sup>4</sup></b> |                                                                         |                                             | 30350, 30354, 30240                                                                                                                                      |
| <b>Coronary Artery Bypass Graft<sup>4</sup></b>       |                                                                         |                                             | 30009, 30019, 30029, 30039, 30049, 30059, 30069, 30079, 30089, 30099, 30109, 30119, 30120, 30129, 30139, 30149, 30159, 30169, 30179, 30189, 30199, 30200 |
| <b>Unstable angina</b>                                | No Code <sup>3</sup>                                                    | I20                                         |                                                                                                                                                          |
| <b>Congestive heart failure</b>                       | 427.09-427.11, 427.19, 428.99, 782.49                                   | I50                                         |                                                                                                                                                          |
| <b>Atrial fibrillation<sup>5</sup></b>                | 427.93, 427.94                                                          | I48                                         |                                                                                                                                                          |
| <b>Peripheral artery disease<sup>6</sup></b>          | 443.89-443.99                                                           | I70.2, I73.9, I74.3, I74.4                  |                                                                                                                                                          |
| <b>Ischemic heart disease (non-MI)</b>                | 411-414                                                                 | I20, I24, I25                               |                                                                                                                                                          |
| <b>Abdominal aortic aneurysm</b>                      | 441                                                                     | I71.3, I71.4                                |                                                                                                                                                          |

For the primary cardiovascular disease composite outcome, the positive predictive value of each outcome using data in the Danish National Patient Registry is: myocardial infarction 97% (95% CI: 91, 99),<sup>7</sup> coronary artery bypass graft surgery 98% (95% CI: 93, 99),<sup>4</sup> percutaneous coronary intervention 98% (95% CI: 93, 99),<sup>4</sup> and stroke 69.3% (95% CI 67.8, 70.9).<sup>8</sup>

## COVARIATES

### 1. Diabetes Mellitus<sup>9</sup>

| Type        | ICD 8    | ICD 10                    |
|-------------|----------|---------------------------|
| 1 and 2     | 249, 250 | O240, O241                |
| Gestational | N/A      | O244, O249                |
| Unspecified | N/A      | E12, E13, E14, O242, O243 |

### 2. Modified Charlson Comorbidity Index<sup>10</sup>

| Conditions and Weight             |          | ICD 8                                                          | ICD 10                                                                   |
|-----------------------------------|----------|----------------------------------------------------------------|--------------------------------------------------------------------------|
| Myocardial infarction             | Weight 1 | 410                                                            | I21;I22;I23                                                              |
| Congestive heart failure          | Weight 1 | 427.09; 427.10; 427.11; 427.19; 428.99; 782.49                 | I50; I11.0; I13.0; I13.2                                                 |
| Peripheral vascular disease       | Weight 1 | 440; 441; 442; 443; 444; 445                                   | I70; I71; I72; I73; I74; I77                                             |
| Cerebrovascular disease           | Weight 1 | 430-438                                                        | I60-I69; G45; G46                                                        |
| Dementia                          | Weight 1 | 290.09-290.19; 293.09                                          | F00-F03; F05.1; G30                                                      |
| Chronic pulmonary disease         | Weight 1 | 490-493; 515-518                                               | J40-J47; J60-J67; J68.4; J70.1; J70.3; J84.1; J92.0; J96.1; J98.2; J98.3 |
| Connective tissue disease         | Weight 1 | 712; 716; 734; 446; 135.99                                     | M05; M06; M08; M09; M30; M31; M32; M33; M34; M35; M36; D86               |
| Ulcer disease                     | Weight 1 | 530.91; 530.98; 531-534                                        | K22.1; K25-K28                                                           |
| Mild liver disease                | Weight 1 | 571; 573.01; 573.04                                            | B18; K70.9; K71; K73; K74; K76.0                                         |
| Diabetes without end-organ damage | Weight 1 | 249.00; 249.06; 249.07; 249.09; 250.00; 250.06; 250.07; 250.09 | E10.0, E10.1; E10.9; E11.0; E11.1; E11.9                                 |
| Diabetes with end-organ damage    | Weight 2 | 249.01-249.05; 249.08; 250.01-250.05; 250.08                   | E10.2-E10.8, E11.2-E11.8                                                 |
| Hemiplegia                        | Weight 2 | 344                                                            | G81; G82                                                                 |
| Moderate to severe renal disease  | Weight 2 | 403; 404; 580-583; 584; 590.09; 593.19; 753.10-753.19; 792     | I12; I13; N00-N05; N07; N11; N14; N17-N19; Q61                           |
| Non-metastatic solid tumour       | Weight 2 | 140-194                                                        | C00-C75                                                                  |
| Leukaemia                         | Weight 2 | 204-207                                                        | C91-C95                                                                  |
| Lymphoma                          | Weight 2 | 200-203; 275.59                                                | C81-C85; C88; C90; C96                                                   |
| Moderate to severe liver disease  | Weight 3 | 070.00; 070.02; 070.04; 070.06; 070.08; 573.00; 456.00-456.09  | B15.0; B16.0; B16.2; B19.0; K72; K76.6; I85                              |
| Metastatic cancer                 | Weight 6 | 195-198; 199                                                   | C76-C80                                                                  |
| AIDS                              | Weight 2 | 079.83                                                         | B21-B24                                                                  |

Note: ICD-10 codes K70.0-K70.3 (mild liver disease) and K70.4 (moderate to severe liver disease) and ICD-8 codes removed as these are liver diseases associated with alcohol-related disease.

Charlson Comorbidity Index codes removed for all analyses as the analysis utilized separate covariates for diabetes, alcohol-related liver disease and chronic hypertension:

- a) Diabetes without end-organ damage (ICD8: 249.00; 249.06; 249.07; 249.09; 250.00; 250.06; 250.07; 250.09; ICD10: E10.0, E10.1; E10.9; E11.0; E11.1; E11.9 )
- b) Diabetes with end-organ damage (ICD8: 249.01-249.05; 249.08; 250.01-250.05; 250.08; ICD10: E10.2-E10.8, E11.2-E11.8)
- c) Liver disease associated with alcohol use [K70.0-K70.3 (mild liver disease) and K70.4 (moderate to severe liver disease)].
- d) Hypertension-related (403, 404 in ICD8 and I11, I12, I13 and I674 in ICD10)

Codes within the Charlson Comorbidity Index that are part of specific outcome measures are excluded as well. For instance, myocardial infarction (MI) is included in CCI when analyzing stroke as an outcome, but excluded from CCI in all the analyses which include MI as an outcome (because all patients with prior MI are excluded in MI analyses).

### 3. Hypertension<sup>11</sup>

| ICD 8   | ICD 10        |
|---------|---------------|
| 400-404 | I10-I15, I674 |

### 4. Alcohol-Related Disease<sup>3</sup>

| ICD 8                      | ICD 10                                                        |
|----------------------------|---------------------------------------------------------------|
| 291, 303, 577.10, 979, 980 | G312, G621, G721, I426, K292, K860, R780, Z721, F10, T51, K70 |

### 5. Spontaneous Abortion<sup>12</sup>

|                                             | ICD 8 | ICD 10      |
|---------------------------------------------|-------|-------------|
| Missed Abortion                             | 6346x | O021, O021A |
| Missed Abortion with dilation and curettage | 6451x |             |
| Spontaneous Abortion                        |       | O03x        |
| Spontaneous Abortion, other                 | 6438x |             |
| Spontaneous Abortion with complications     | 6439x |             |

### 6. Pregnancy Complications<sup>11,13-17</sup>

|                                         | ICD 8                     | ICD 10                     |
|-----------------------------------------|---------------------------|----------------------------|
| <b>A) Placental</b>                     |                           |                            |
| Pre-eclampsia                           | 63703, 63704, 63709       | O140—O142, O149, O150-O159 |
| Gestational or unspecified Hypertension | 63700                     | O13, O16                   |
| Placental abruption                     | 63219, 6515               | O45                        |
| Placental infarction                    | No code                   | O43.1, O43.8, O43.9        |
| <b>B) Non-Placental</b>                 |                           |                            |
| Intrauterine hypoxia and birth asphyxia | 77640–77650, 76840, 76890 | P20, P21                   |
| Uterine rupture                         | 659                       | O71.0, O71.1               |
| Umbilical cord prolapse or vasa previa  | 663.3, 663.4              | O69                        |

|                           |         |       |
|---------------------------|---------|-------|
| Amniotic fluid embolism   | 673.1   | O88.1 |
| Fetal-maternal hemorrhage | No code | O43.0 |
| Chorioamnionitis          | No code | O41.1 |

Other Notes on Covariates:

Marital status was ascertained from Danish Civil Registry at the time of the index event. A 6 month allowance was made post-index event to allow for delayed registration of marriage.



eTable 2. Development of the cardiovascular disease composite outcome of hospitalization for acute myocardial infarction, coronary artery revascularization, or acute stroke, evaluating mothers whose infant had a major congenital anomaly with matching dissolved stratified by duration of follow-up (*Additional analysis 6*).

|                               | No. of events/women at risk |               | Incidence rate per 1000 person-years (95% CI) |                  | Hazard ratio (95% CI) |                  |                       |
|-------------------------------|-----------------------------|---------------|-----------------------------------------------|------------------|-----------------------|------------------|-----------------------|
|                               | Exposed                     | Comparison    | Exposed                                       | Comparison       | Rate difference       | Unadjusted       | Adjusted <sup>a</sup> |
| <b>Additional analysis 6:</b> |                             |               |                                               |                  |                       |                  |                       |
| <b>Year of Birth</b>          |                             |               |                                               |                  |                       |                  |                       |
| 1979-1993                     | 736/20,232                  | 6,218/202,133 | 1.37 (1.27-1.47)                              | 1.15 (1.12-1.18) | 0.22 (0.11-0.32)      | 1.20 (1.11-1.29) | 1.14 (1.05-1.23)      |
| 1994-2003 <sup>b</sup>        | 142/11,178                  | 1,083/111,605 | 0.86 (0.72-1.01)                              | 0.66 (0.62-0.70) | 0.21 (0.06-0.35)      | 1.31 (1.10-1.57) | 1.13 (0.95-1.35)      |
| 2004-2013 <sup>c</sup>        | 36/11,483                   | 215/114,313   | 0.64 (0.43-0.85)                              | 0.38 (0.33-0.43) | 0.26 (0.04-0.47)      | 1.67 (1.17-2.38) | 1.44 (1.01-2.06)      |

<sup>a</sup> Adjusted for matching factors used in primary analysis (parity, mother's age, and year of child's birth), maternal demographics (marital status, immigration status), socio-economic status (income quartile, educational level), previous maternal health (diabetes mellitus, modified Charlson Comorbidity Index score, chronic hypertension, history of alcohol-related disease, depression), previous spontaneous abortion, and pregnancy complications.

<sup>b</sup> Additional covariate adjusted for in 1994-2003 includes maternal smoking history. Without this additional covariate, the adjusted hazard ratio (95% CI) is 1.15 (0.97-1.38).

<sup>c</sup> Additional covariates adjusted for in 2004-2013 include maternal smoking history and body mass index. Without these additional covariates, the adjusted hazard ratio (95% CI) is 1.47 (1.03-2.10).

eFigure. Development of the cardiovascular disease composite outcome of a hospitalization for acute myocardial infarction, coronary artery revascularization, or acute stroke, evaluating mothers whose infants had a multi-organ or single-organ major congenital anomaly and those in the comparison cohort (*Additional analysis 2*).

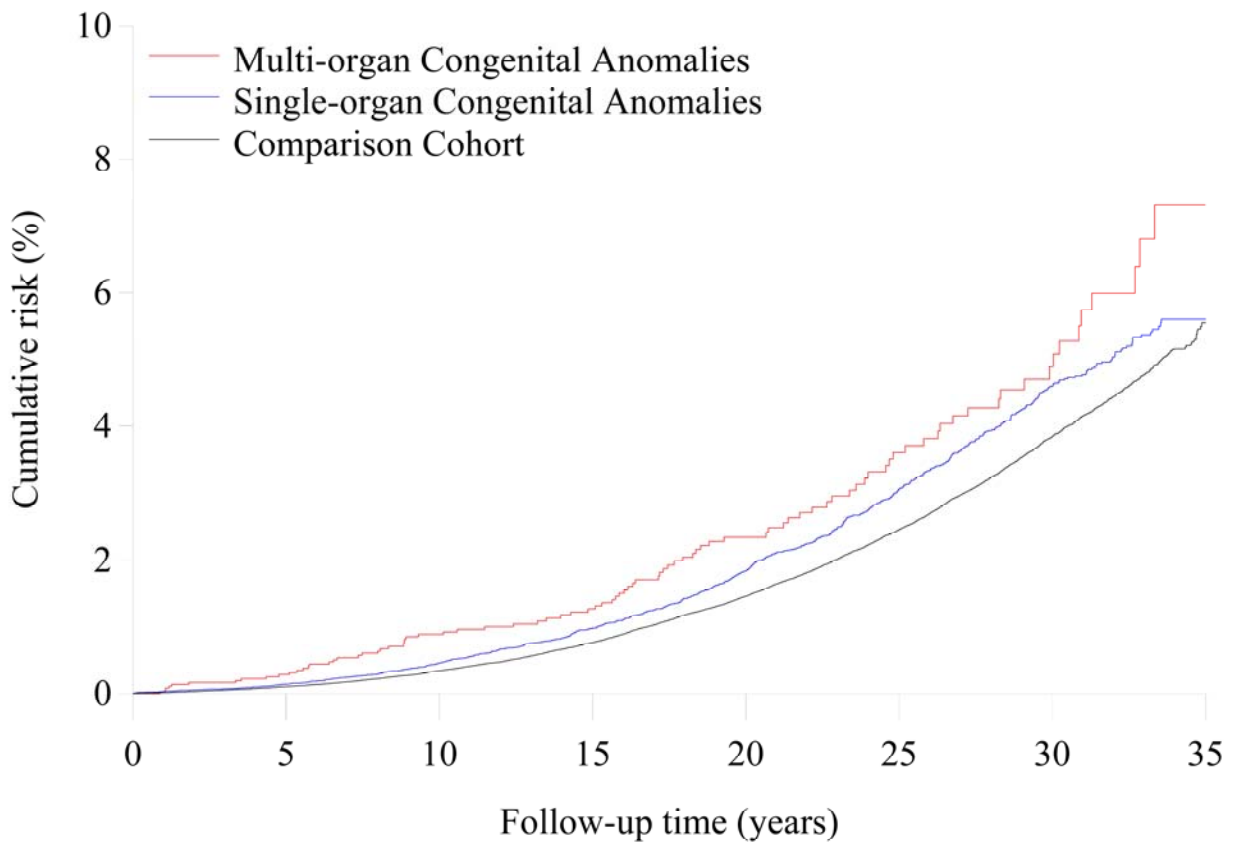

| Number at risk: | 0      | 5      | 10     | 15     | 20     | 25     | 30    | 35 |
|-----------------|--------|--------|--------|--------|--------|--------|-------|----|
| Multi-organ     | 3837   | 3254   | 2652   | 2043   | 1435   | 941    | 477   |    |
| Single-organ    | 39056  | 33420  | 28076  | 22959  | 17783  | 11533  | 5611  |    |
| Comparison      | 428051 | 366143 | 307667 | 251237 | 193625 | 125817 | 61778 |    |

## eReferences

1. Larsen H, Nielsen GL, Bendtsen J, Flint C, Olsen J, Sorensen HT. Predictive value and completeness of the registration of congenital abnormalities in three Danish population-based registries. *Scand J Public Health*. 2003;31(1):12-16.
2. Pasternak B, Svanstrom H, Molgaard-Nielsen D, Melbye M, Hviid A. Metoclopramide in pregnancy and risk of major congenital malformations and fetal death. *JAMA*. 2013;310(15):1601-1611.
3. Pottegard A, Garcia Rodriguez LA, Poulsen FR, Hallas J, Gaist D. Antithrombotic drugs and subarachnoid haemorrhage risk. A nationwide case-control study in Denmark. *Thromb Haemost*. 2015;114(5):1064-1075.
4. Adelborg K, Sundboll J, Munch T, et al. Positive predictive value of cardiac examination, procedure and surgery codes in the Danish National Patient Registry: a population-based validation study. *BMJ Open*. 2016;6(12):e012817.
5. Frost L, Vestergaard P. Caffeine and risk of atrial fibrillation or flutter: the Danish Diet, Cancer, and Health Study. *Am J Clin Nutr*. 2005;81(3):578-582.
6. Sogaard KK, Schmidt M, Pedersen L, Horvath-Puho E, Sorensen HT. 30-year mortality after venous thromboembolism: a population-based cohort study. *Circulation*. 2014;130(10):829-836.
7. Sundboll J, Adelborg K, Munch T, et al. Positive predictive value of cardiovascular diagnoses in the Danish National Patient Registry: a validation study. *BMJ Open*. 2016;6(11):e012832.
8. Luhdorf P, Overvad K, Schmidt EB, Johnsen SP, Bach FW. Predictive value of stroke discharge diagnoses in the Danish National Patient Register. *Scand J Public Health*. 2017;45(6):630-636.
9. Wu CS, Nohr EA, Bech BH, Vestergaard M, Olsen J. Long-term health outcomes in children born to mothers with diabetes: a population-based cohort study. *PLoS One*. 2012;7(5):e36727.
10. Thygesen SK, Christiansen CF, Christensen S, Lash TL, Sorensen HT. The predictive value of ICD-10 diagnostic coding used to assess Charlson comorbidity index conditions in the population-based Danish National Registry of Patients. *BMC Med Res Methodol*. 2011;11:83.
11. Hansen AT, Schmidt M, Horvath-Puho E, et al. Preconception venous thromboembolism and placenta-mediated pregnancy complications. *J Thromb Haemost*. 2015;13(9):1635-1641.
12. Lohse SR, Farkas DK, Lohse N, et al. Validation of spontaneous abortion diagnoses in the Danish National Registry of Patients. *Clin Epidemiol*. 2010;2:247-250.
13. Ray JG, Redelmeier DA, Urquia ML, Guttmann A, McDonald SD, Vermeulen MJ. Risk of cerebral palsy among the offspring of immigrants. *PLoS One*. 2014;9(7):e102275.
14. Laszlo KD, Liu XQ, Svensson T, et al. Psychosocial stress related to the loss of a close relative the year before or during pregnancy and risk of preeclampsia. *Hypertension*. 2013;62(1):183-189.

15. Altman M, Edstedt Bonamy AK, Wikstrom AK, Cnattingius S. Cause-specific infant mortality in a population-based Swedish study of term and post-term births: the contribution of gestational age and birth weight. *BMJ Open*. 2012;2(4).
16. Auger N, Fraser WD, Healy-Profitos J, Arbour L. Association Between Preeclampsia and Congenital Heart Defects. *JAMA*. 2015;314(15):1588-1598.
17. Rai R, Regan L. Recurrent miscarriage. *Lancet*. 2006;368(9535):601-611.
